# Supplementary material for: A machine learning approach to driver attribution of dissolved organic matter dynamics in two contrasting freshwater systems
Source: Copernicus journal article supplement (doi:10.5194/egusphere-2025-4049), 2025-09-01
Supplement: Supplementary file [file egusphere-2025-4049-AC2-supplement.pdf]

| Code       | Colour | CODE_18 | LAND COVER                                                                 |
|------------|--------|---------|----------------------------------------------------------------------------|
| <b>111</b> |        | 111     | Continuous urban fabric                                                    |
| <b>112</b> |        | 112     | Discontinuous urban fabric                                                 |
| <b>121</b> |        | 121     | Industrial or commercial units, public services and military installations |
| <b>131</b> |        | 131     | Mineral extraction sites                                                   |
| <b>142</b> |        | 142     | Green urban areas                                                          |
| <b>211</b> |        | 211     | Non-irrigated arable land                                                  |
| <b>212</b> |        | 212     | Permanently irrigated arable land *                                        |
| <b>231</b> |        | 231     | Pastures                                                                   |
| <b>242</b> |        | 242     | Complex cultivation patterns                                               |
| <b>243</b> |        | 243     | Land principally occupied by agriculture                                   |
| <b>311</b> |        | 311     | Broad-leaved forest                                                        |
| <b>312</b> |        | 312     | Coniferous forest                                                          |
| <b>313</b> |        | 313     | Mixed forest                                                               |
| <b>321</b> |        | 321     | Natural grassland                                                          |
| <b>322</b> |        | 322     | Moors and heathland                                                        |
| <b>323</b> |        | 323     | Sclerophyllous vegetation*                                                 |
| <b>324</b> |        | 324     | Transitional woodland/shrubs                                               |
| <b>332</b> |        | 332     | Bare rock                                                                  |
| <b>333</b> |        | 333     | Sparsely vegetated areas                                                   |
| <b>511</b> |        | 511     | Water courses                                                              |
| <b>512</b> |        | 512     | Water bodies                                                               |

| Land cover           | % of total area |
|----------------------|-----------------|
| Organic-rich soil LC | 6.3%            |
| Agriculture          | 18.0%           |
| Grassland            | 12.3%           |
| Urban                | 3.8%            |
| Forest               | 59.2%           |
| Watercourse          | 0.3%            |
|                      | 100.0%          |

# Sau Reservoir

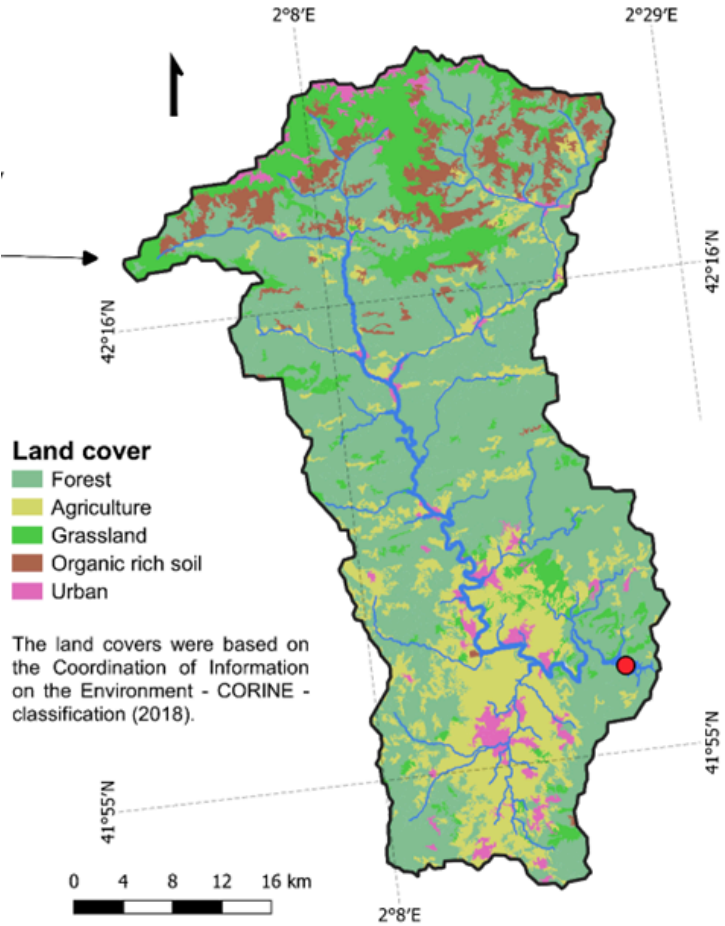

Coordinate system: EPSG: 4326 - WGS 84
